# Supplementary material for: Conservation Agriculture in a High Fertilizer Input Rice-Based Cropping System Improves Soil Fertility and Crop Productivity but Fails to Correct Negative K Balance
Source: Research Square preprint supplement (doi:10.21203/rs.3.rs-7617529/v1), 2025-10-27
Supplement: Supplementary file 1 [file 79540d0aed40b1c533cb6239.docx]

Appendix A. Supplementary data

Suppl. table 1 Monthly average temperature, rainfall, relative humidity, average sunshine and evapotranspiration of Rajshahi district during the years 2019-2020

| Months | Average temperature (0 C) | | | | Relative Humidity (%) | | Rainfall (mm) | | Average Sunshine (hour/day) | | Evapo-transpiration (mm) | |
| --- | --- | --- | --- | --- | --- | --- | --- | --- | --- | --- | --- | --- |
| Maximum | | Minimum | |
| 2019 | 2020 | 2019 | 2020 | 2019 | 2020 | 2019 | 2020 | 2019 | 2020 | 2019 | 2020 |
| January | 25.5 | 23.3 | 10.2 | 11.4 | 84.0 | 86.2 | 0.0 | 16.2 | 7.37 | 4.00 | 35.7 | 24.1 |
| February | 27.6 | 26.7 | 13.2 | 12.9 | 80.3 | 77.8 | 47.2 | 0.0 | 7.63 | 6.05 | 41.2 | 37.0 |
| March | 32.1 | 31.6 | 17.5 | 18.0 | 74.2 | 75.3 | 68.0 | 28.5 | 7.84 | 7.82 | 63.6 | 57.7 |
| April | 34.5 | 34.4 | 23.0 | 21.7 | 79.6 | 74.0 | 114 | 22.8 | 7.16 | 6.87 | 60.2 | 66.2 |
| May | 36.1 | 33.8 | 25.7 | 24.2 | 82.3 | 85.0 | 146 | 186 | 7.42 | 5.60 | 65.8 | 42.6 |
| June | 35.8 | 34.7 | 27.0 | 26.2 | 84.1 | 88.9 | 122 | 248 | 5.94 | 4.51 | 63.1 | 42.7 |
| July | 34.5 | 33.9 | 26.5 | 26.9 | 88.9 | 91.2 | 301 | 412 | 4.51 | 3.27 | 43.2 | 28.8 |
| August | 34.5 | 34.5 | 26.9 | 27.2 | 87.5 | 88.5 | 92.1 | 144 | 5.60 | 4.60 | 44.9 | 48.6 |
| September | 33.4 | 34.1 | 26.2 | 26.8 | 91.4 | 91.8 | 202 | 217 | 4.70 | 3.90 | 39.7 | 41.1 |
| October | 31.4 | 33.6 | 23.0 | 25.0 | 92.2 | 90.7 | 129 | 139 | 6.41 | 7.21 | 45.5 | 45.8 |
| November | 30.0 | 30.2 | 18.3 | 17.4 | 91.0 | 85.5 | 3.4 | 0.2 | 6.49 | 8.08 | 34.5 | 41.2 |
| December | 26.2 | 25.2 | 14.6 | 13.0 | 85.1 | 87.9 | 0.0 | 0.0 | 7.31 | 5.78 | 31.7 | 32.4 |

Suppl. table 2 Season wise cropping systems in the experiment sites from 2018

| Cropping year | Cropping system |
| --- | --- |
| 2018-19 | Potato-Maize-Transplanting Aman Rice |
| 2019-20 | Potato-Maize-Transplanting Aman Rice |

**Suppl. Table 3 Mean volume of Irrigation water, rain water and leaching water**

| Treatments | Irrigation water needed (ML ha-1) | | Rain water added (ML ha-1) | | Leaching water loss (ML ha-1) | |
| --- | --- | --- | --- | --- | --- | --- |
| 2019 | 2020 | 2019 | 2020 | 2019 | 2020 |
| CT | 6.4 | 4 | 12.3 | 15.1 | 8.73 | 10.3 |
| SP | 9.15 | 10.6 |
